# Supplementary material for: An integrated single-cell transcriptomic dataset for non-small cell lung cancer
Source: PubMed Central journal article supplement (PMC10042991; doi:10.1038/s41597-023-02074-6), 2023-03-27
Supplement: 41597_2023_2074_MOESM1_ESM.pdf [file 41597_2023_2074_MOESM1_ESM.pdf]

## Supplementary Figures

| <b>Description</b>                                                                                                                         | <b>Slide</b> |
|--------------------------------------------------------------------------------------------------------------------------------------------|--------------|
| Supplementary Figure 1. Pre-processing and cell type annotation of the integrated reference data set.                                      | 2            |
| Supplementary Figure 2. Pre-processing and cell type annotation of the integrated validation data set.                                     | 3            |
| Supplementary Figure 3. Validation cell type prediction scores (level 2).                                                                  | 4            |
| Supplementary Figure 4. Number and proportion of all cells from level 1 and 2 annotations.                                                 | 5            |
| Supplementary Figure 5. Radar plots showing gene expression signature of query cells and reference cells of the five CD8+ T cell subtypes. | 6            |

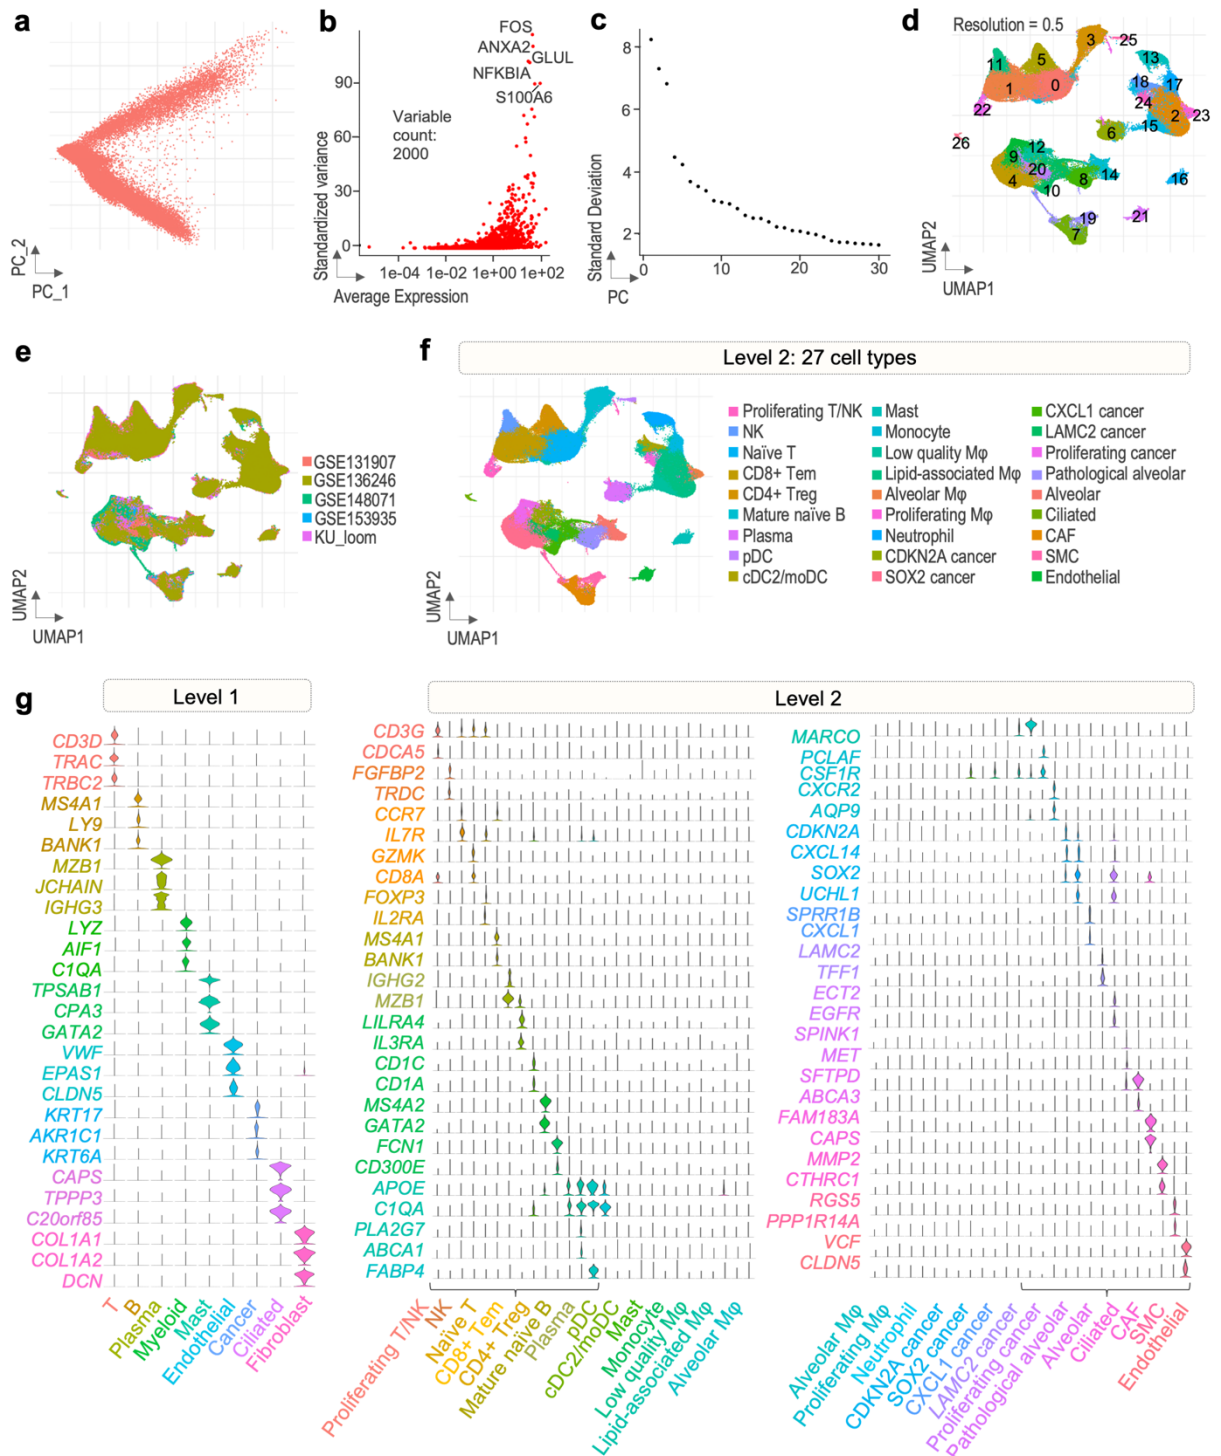

Supplementary Figure 1. Pre-processing and cell type annotation of the integrated reference data set. (a) PCA plot of the reference dataset. (b) Top 5 variable features in the reference data set. (c) Elbow plot showing a ranking by standard deviation for top 20 PCs. (d) Seurat clusters obtained for the reference data set. (e) Distribution of cells derived from the five original datasets in the reference dataset. (f) Cell types of the reference dataset (level 2). (g) Violin plots of cell type-specific gene markers used for level 1 and 2 annotations of the reference dataset.

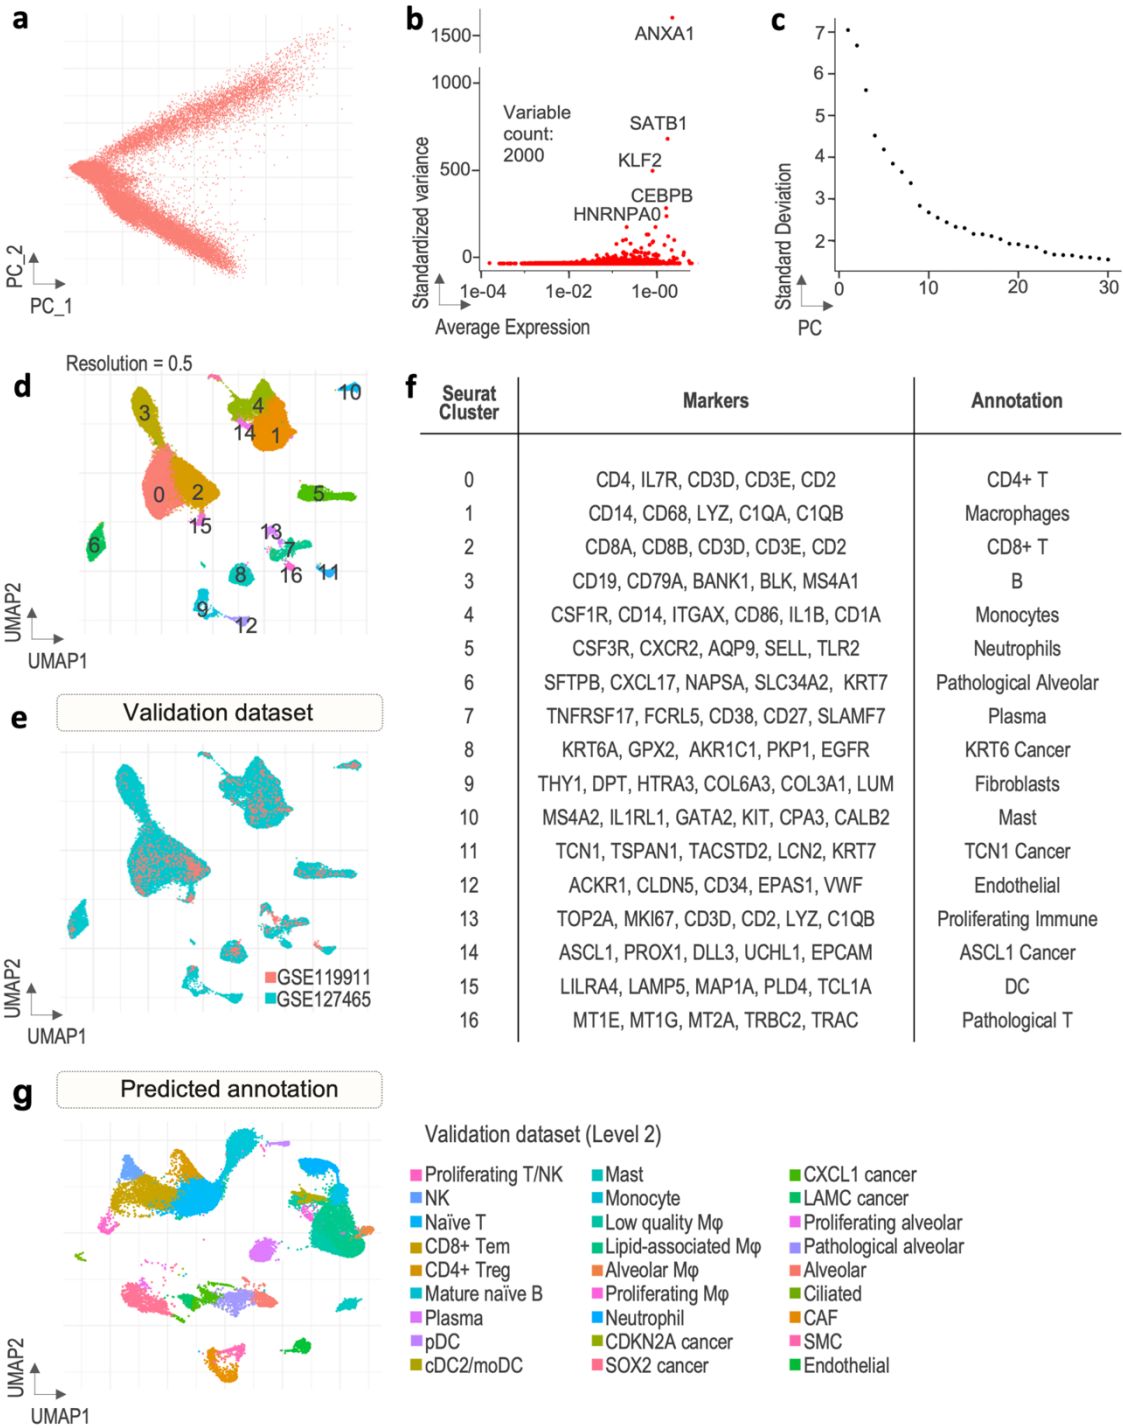

Supplementary Figure 2. Pre-processing and cell type annotation of the integrated validation data set. (a) PCA plot of the validation dataset. (b) Top 5 variable features in the validation data set. (c) Elbow plot showing a ranking by standard deviation for top 20 PCs. (d) Seurat clusters obtained for the validation data set. (e) Distribution of cells derived from the two original datasets in the validation dataset. (f) Table of cell type-specific gene markers used for

annotation of the validation dataset. (g) Cells of the validation dataset projected in a UMAP structure of the reference with predicted annotation (level 2).

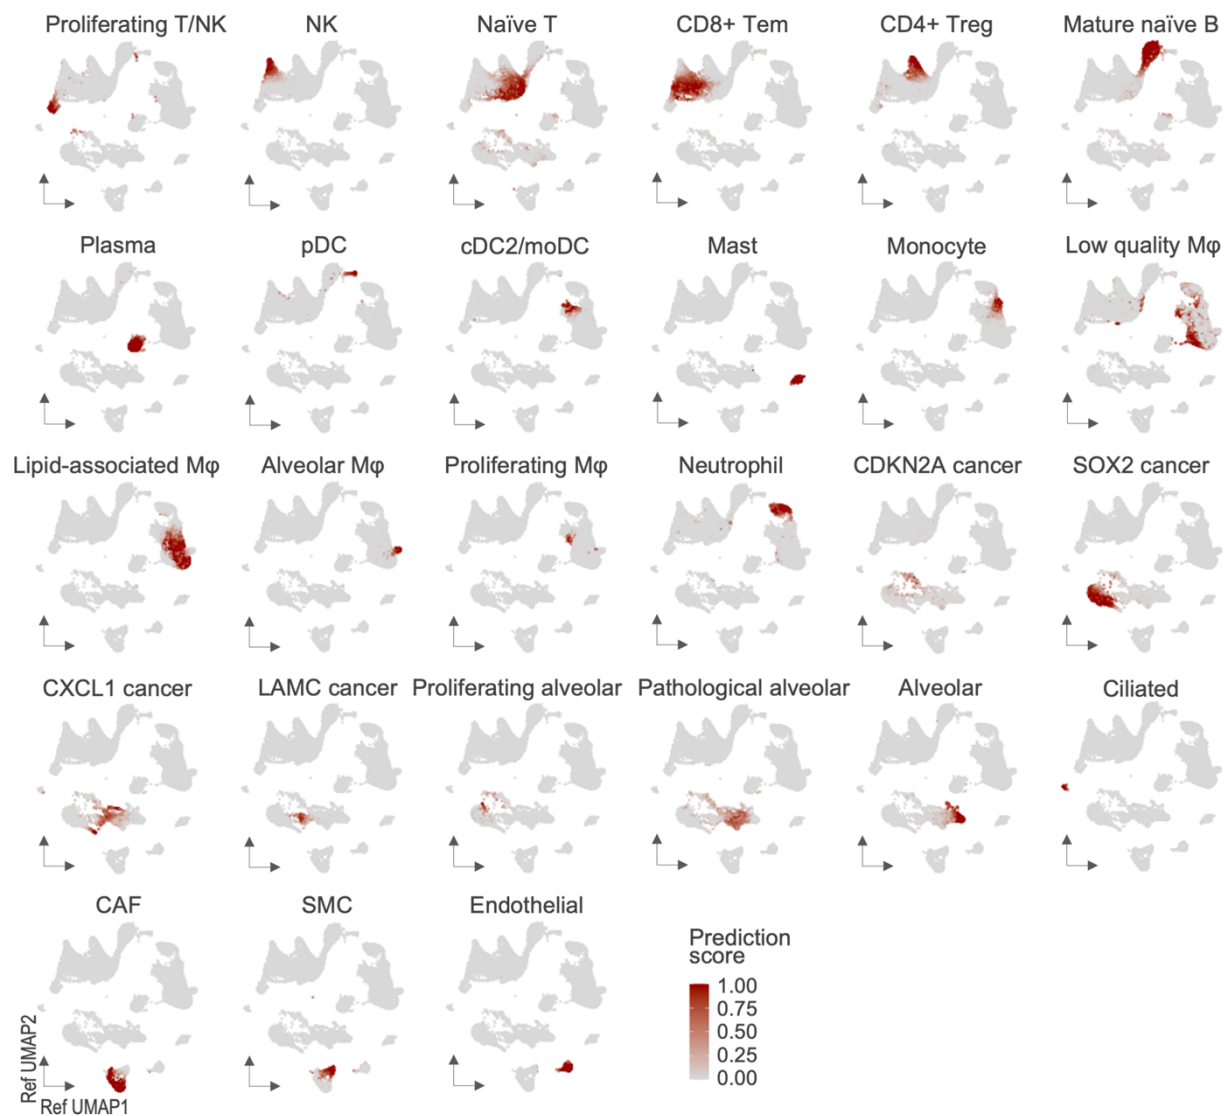

Supplementary Figure 3. Validation cell type prediction scores (level 2).

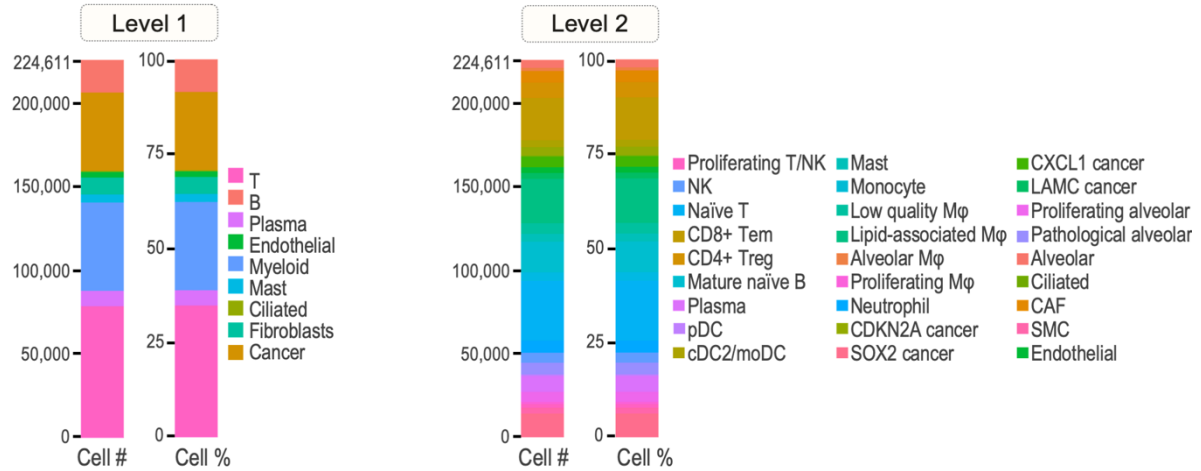

Supplementary Figure 4. Number and proportion of all cells from level 1 (left) and 2 (right) annotations.

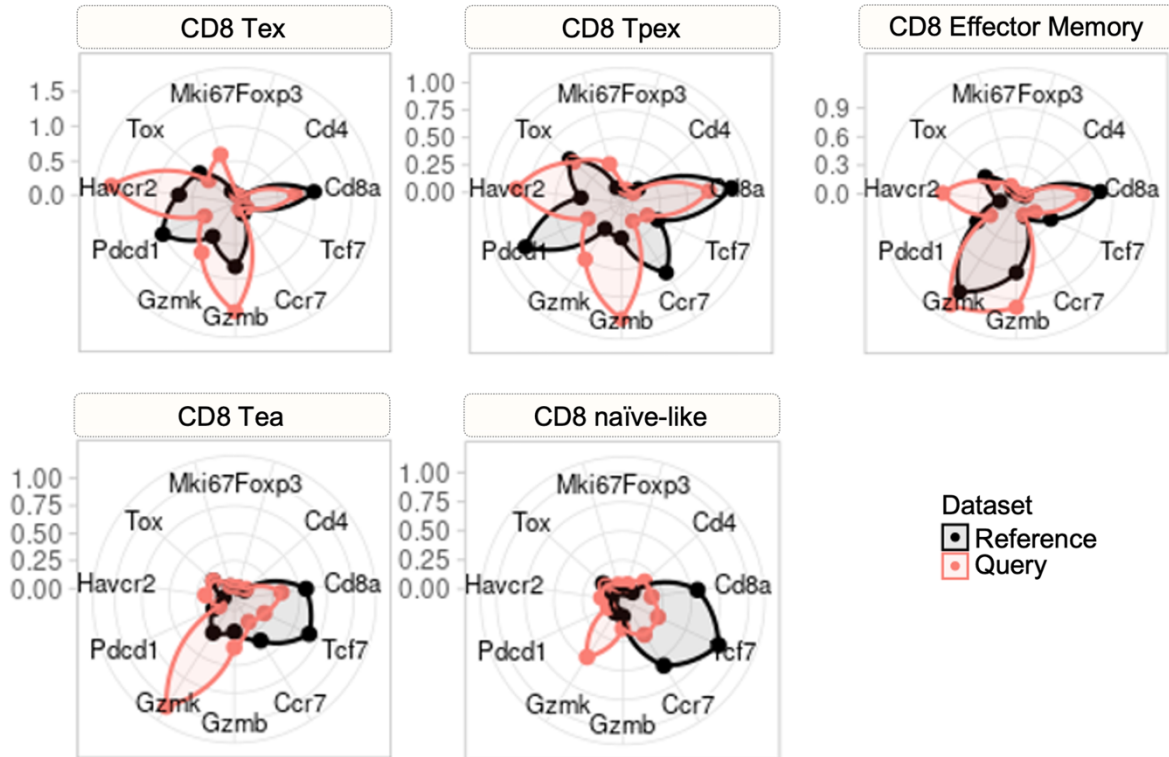

Supplementary Figure 5. Radar plots showing gene expression signature of query cells (red) and reference cells (black) of the five CD8+ T cell subtypes.
